# Supplementary material
Source: HighWire-hosted journal article supplement (doi:10.1101/rna.080653.125)
Supplement: Supplemental_Legends.docx [file Supplemental_Legends.docx]

**Figure S1. Expression of SMG-5(D464A).** Anti-HA or Anti-FLAG blot of 3xHA tagged SMG-5 or 3xFLAG tagged SMG-6 in *C. elegans*. Asterisk indicates a non-specific band.

**Figure S2. The predicted PIN dimer interface is conserved.**

Alphafold2-predicted *H. sapiens* SMG5 and SMG6 PIN heterodimer with residues colored by conservation via Consurf.

**Figure S3. SMG5 and SMG6 PINs are predicted to interact.** A) Heatmap of ipTM scores across various PIN domains from various species. Known interactions are boxed in green, SMG5 and SMG6 boxed in blue. Boxes without a number indicate that Alphafold predicted no interaction.

**Figure S4. hSMG5 PIN interacts with hSMG6 PIN.** (A) Pulldown of recombinantly expressed 2xFLAG::SMG6 PIN with GST::SMG5 PIN-bound resin. Anti–FLAG immunoblot to assess the amount of SMG6 PIN bound to SMG5 PIN. (B) Quantified FLAG signal intensity normalized to total protein (GST or GST::SMG5) across biological replicates.

**Figure S5. Surface-exposed basic residues on SMG-5 PIN are required for NMD and are predicted to interact with RNA.** (A) Alphafold3-predicted heterodimer of *C. elegans* SMG-5 and SMG-6 PIN domains along with RNA. Zoom in shows residues mutated in (B). (B) Functional NMD assay of the sites highlighted in (A). P-values calculated by an unpaired t-test with asterisks indicating p<0.01 for comparisons to *unc-54(r293)*. Error bars show one standard deviation.
