# Supplementary material
Source: HighWire-hosted journal article supplement (doi:10.1101/rna.080653.125)
Supplement: Supplemental_TableS1.xlsx [file Supplemental_TableS1.xlsx]

## Sheet: Sheet1
Strain #	Genotype	Strain Construction	Sequence around any CRISPR/Cas9-introduced mutations
WJA 0639	PD1074 (VC2010, N2)	wild type animals	N/A
WJA 0884	unc-54(r293) I; rrrSi387[Pdpy-30::mCherry::h2b::NMDE::tbb-2::operon::gfp::h2b::tbb-2; unc-119(+)] II	Made by crossing	N/A
WJA 5056	smg-5(srf5056|3xFLAG::TEV::3xHA) I	Made by CRISPR/Cas9	GAATCATATCAATTCCGTATTCACATCCATGTCACTCACAGATtatAAAgatCATgacGGAGATtatAAAgacCATgatATTGATtatAAAgatGACgatGATaagGAAAATTTGTATTTTCAAGGATATcctTACgatGTTccaGACtatGCTggaTACcctTATgatGTCccaGATtacGCAggaTCATATccaTACgatGTTccgGATtacTCTATTTCTATGACCAGCTTTCTGCTGAATGGTCCAATATCCGAACCCAATGTTGAAT
WJA 5067	smg-5(srf5064|D461K) unc-54(r293) I; rrrSi387[Pdpy-30::mCherry::h2b::NMDE::tbb-2::operon::gfp::h2b::tbb-2; unc-119(+)] II	Made by CRISPR/Cas9	AATTTGGGATATCGATGATTTCATCTGCATTTTGCCATCAACtGTtttaaAg GAg CTa GAT TAc CAa AAg ACc AAa AAc CGt GCt GTg CGa CCg GTc ATTCGGGCATTAATGGAGCTTCAAGCAGAGGGAAAAATTGTG
WJA 5069	smg-5(srf5066|D464A|3xFLAG::TEV::3xHA) I	Made by CRISPR/Cas9	AATTTGGGATATCGATGATTTCATCTGCATTTTGCCATCA ACt GTt CTc GAc GAg CTa GcT TAc CAa AAg ACc AAa AAc CGt GCt GTg CGa CCg GTc ATTCGGGCATTAATGGAGCTTCAAGCAGAGGGAAAAATTGTG
WJA 5075	smg-5(srf5071|D464K) unc-54(r293) I; rrrSi387[Pdpy-30::mCherry::h2b::NMDE::tbb-2::operon::gfp::h2b::tbb-2; unc-119(+)] II	Made by CRISPR/Cas9	AATTTGGGATATCGATGATTTCATCTGCATTTTGCCATCAACt GTt CTa GAt GAg CTc aag TAc CAa AAg ACG AAa AAc CGt GCt GTg CGa CCg GTcATTCGGGCATTAATGGAGCTTCAAGCAGAGGGAAAAATTGTG
WJA 5077	smg-5(srf5070|KK>AA) unc-54(r293) I	Made by CRISPR/Cas9	AATTTGGGATATCGATGATTTCATCTGCATTTTGCCATCAACtGTtCTaGAtGAgCTcGAcTAcCAagcgACGgcGAAcCGtGCtGTgCGaCCgGTcATTCGGGCATTAATGGAGCTTCAAGCAGAGGGAAAAATTGTG
WJA 5078	unc-54(r293) I; smg-6(srf5074|K1220D) III	Made by CRISPR/Cas9	CCTTCTGCCACCGAAATTTCCCAAAAATGTGTGCTCATCACCGGAGACCGAGGCTTGACGATCgAtGCAATCGGAAATAATTTCCCGTGCCGCGGAATTTCAAATTTCACGAAATGGATCATCAATGTGTGA
WJA 5079	smg-5(srf5063|D464N) unc-54(r293)I; rrrSi387[Pdpy-30::mCherry::h2b::NMDE::tbb-2::operon::gfp::h2b::tbb-2; unc-119(+)] II	Made by CRISPR/Cas9	AATTTGGGATATCGATGATTTCATCTGCATTTTGCCATCA ACt GTt CTc GAc GAg CTc aAT TAc CAa AAg ACc AAa AAc CGt GCt GTg CGa CCg GTc ATTCGGGCATTAATGGAGCTTCAAGCAGAGGGAAAAATTGTG
WJA 5080	smg-5(srf5068|KKRR>AAAA) unc-54(r293) I; rrrSi387[Pdpy-30::mCherry::h2b::NMDE::tbb-2::operon::gfp::h2b::tbb-2; unc-119(+)] II	Made by CRISPR/Cas9	AAT TTG GGA TAT CGA TGA TTT CAT CTG CAT TTT GCC ATC AAC TGT TCT AGA TGA GCT CGA CTA CCA AGC GAC GGC GAA CCG TGC TGT GGC TCC GGT CAT TGC GGC ATT AAT GGA GCT TCA AGC AGA GGG AAA AAT TGT GCT AA
WJA 5082	smg-5(srf5071|D464K) unc-54(r293) I; rrrSi387[Pdpy-30::mCherry::h2b::NMDE::tbb-2::operon::gfp::h2b::tbb-2; unc-119(+)] II; smg-6(srf5074|K1220D) III	Made by crossing	N/A
WJA 5083	smg-5(srf5064|D461K) unc-54(r293) I; smg-6(srf5074|K1220D) III	Made by crossing	N/A
WJA 6110	smg-5(srf6110|D464A) I	Made by CRISPR/Cas9	AATTTGGGATATCGATGATTTCATCTGCATTTTGCCATCA ACt GTt CTc GAc GAg CTa GcT TAc CAa AAg ACc AAa AAc CGt GCt GTg CGa CCg GTc ATTCGGGCATTAATGGAGCTTCAAGCAGAGGGAAAAATTGTG
WJA 6114	smg-5(srf6115|Δ) I	Made by CRISPR/Cas9	CAAACTGAAAATGTGCATTCTCCAGTAACTGAGTAGATCT AGG TGG AATTGGAACCGCTTAAAATCATTGAGATCATATTCTTCGG
WJA 6130	smg-6(srf6130|Δ) III	Made by CRISPR/Cas9	TACCGTCCAGGAATGCTCCGCCAAGATCTTAAGTAGGTGATGGTGGGACCAATTTTGGGGTGAAGTTTGAAATTTTCCAA
