# Supplementary material
Source: HighWire-hosted journal article supplement (doi:10.1101/rna.080653.125)
Supplement: Supplemental_TableS2.xlsx [file Supplemental_TableS2.xlsx]

## Sheet: Sheet1
Library	Strain used	Type of Library	Accesion Number (SRA)	Figure	Genotype
sMM20	WJA 0639	RNA-seq	SAMN49195721	Figure 2	wt
sMM21	WJA 6110	RNA-seq	SAMN49195722	Figure 2	smg-5(D464A)
sMM22	WJA 6114	RNA-seq	SAMN49195723	Figure 2	smg-5(Δ)
sMM24	WJA 6130	RNA-seq	SAMN49195724	Figure 2	smg-6(Δ)
sMM25	WJA 0639	RNA-seq	SAMN49195725	Figure 2	wt
sMM26	WJA 6110	RNA-seq	SAMN49195726	Figure 2	smg-5(D464A)
sMM27	WJA 6114	RNA-seq	SAMN49195727	Figure 2	smg-5(Δ)
sMM28	WJA 6130	RNA-seq	SAMN49195728	Figure 2	smg-6(Δ)
